# Supplementary material
Source: PubMed Central journal article supplement (PMC1570844)
Supplement: bmj_333_7569_632__1.pdf [file bmj_333_7569_632__1.pdf]

## Extra references

- w1. Tomas Carmona I, Limeres Posse J, Diz Dios P, Fernandez Feijoo J, Vazquez Garcia E. Extraoral etiology of halitosis. *Med Oral* 2001;6:40-7.
- w2. McKeown L. Social relations and breath odour. *Int J Dent Hyg* 2003;1:213-7.
- w3. Kleinberg I, Wolff MS, Codipilly DM. Role of saliva in oral dryness, oral feel and oral malodour. *Int Dent J* 2002;52:236-40.
- w4. Aizawa F, Kishi M, Moriya T, Takahashi M, Inaba D, Yonemitsu M. The analysis of characteristics of elderly people with high VSC level. *Oral Dis* 2005;11(suppl 1):80-2.
- w5. Washio J, Sato T, Koseki T, Takahashi N. Hydrogen sulphide-producing bacteria in tongue biofilm and their relationship with oral malodour. *J Med Microbiol* 2005;54:889-95.
- w6. Hunter CM, Niles HP, Vazquez J, Kloos C, Subramanyam R, Williams MI, et al. Breath odor evaluation by detection of volatile sulphur compounds—correlation with organoleptic odor rating. *Oral Dis* 2005;11:48-50.
- w7. Kato H, Yoshida A, Awano T, Ansai T, Takehara T. Quantitative detection of volatile sulphur compound-producing microorganisms in oral specimens using real-time PCR. *Oral Dis* 2005;11:67-71.
- w8. Pratten J, Pasu M, Jackson G, Flanagan A, Wilson M. Modelling oral malodour in a longitudinal study. *Arch Oral Biol* 2003;48:737-43.
- w9. Winkel EG, Roldan S, Van Winkelhoff AJ, Herrera D, Sanz M. Clinical effects of a new mouthrinse containing chlorhexidine, cetylpyridinium chloride and zinc lactate on oral halitosis: a dual-center, double-blind placebo-controlled study. *J Clin Periodontol* 2003;30:300-6.
- w10. Borden LC, Chaves ES, Bowman JP, Fath BM, Hollar GL. The effect of four mouthrinses on oral malodor. *Compend Contin Educ Dent* 2002;23:531-46.
- w11. Frascella J, Gilbert RD, Fernandez P. Efficacy of a chlorine dioxide-containing mouthrinse in oral malodour. *Compend Contin Educ Dent* 2000;21:241-54.
- w12. Rolla G, Jonski G, Young A. The significance of the source of zinc and its anti-VSC effect. *Int Dent J* 2002;52:233-5.
- w13. Young A, Jonski G, Rolla G. A study of triclosan and its solubilizers as inhibitors of oral malodour. *J Clin Periodontol* 2002;29:1078-81.
- w14. Gaffar A, Nabi N, Kashuba B, Williams M, Herles S, Olsen S, et al. Anti-plaque effects of dentifrices containing triclosan/copolymer/NaF system versus triclosan without the copolymer. *Am J Dent* 1990;3:S7-4.
- w15. Sterer N, Rosenberg M. Effectiveness of deglycosylation of salivary glycoproteins on oral malodour production. *Int Dent J* 2002;52:229-32.
- w16. Burton JP, Chilcott CN, Tagg JR. The rationale and potential for the reduction of oral malodour using *Streptococcus salivarius* probiotics. *Oral Dis* 2005;11:29-31.

- w17. Burton JP, Chilcott CN, Moore CJ, Speiser G, Tagg JR. A preliminary study of the effect of probiotic *Streptococcus salivarius* K12 on oral malodour parameters. *J Applied Microbiol* 2006;100:754.
- w18. Krespi YP, Slatkine M, Marchenko M, Protic J. Lethal photosensitisation of oral pathogens via red-filtered halogen lamp. *Oral Dis* 2005;11:92-5.
